# Supplementary material for: GPR6 Structural Insights: Homology Model Construction and Docking Studies
Source: PubMed Central journal article supplement (PMC7037797; doi:10.3390/molecules25030725), 2020-02-07
Supplement: molecules-25-00725-s001.pdf [file molecules-25-00725-s001.pdf]

1 *Supplementary Materials*

## 2 **GPR6 Structural Insights: Homology Model** 3 **Construction and Docking Studies**

4 **Israa H. Isawi**<sup>1</sup>, **Paula Morales**<sup>2</sup>, **Noori Sotudeh**<sup>3</sup>, **Dow P. Hurst**<sup>1</sup>, **Diane L. Lynch**<sup>1</sup>, and **Patricia**  
5 **H. Reggio**<sup>1,\*</sup>

6 <sup>1</sup> Department of Chemistry and Biochemistry, University of North Carolina at Greensboro, Greensboro, NC  
7 27412, USA; [ihsaw@uncg.edu](mailto:ihsaw@uncg.edu) (I.H.I.), [dphurst@uncg.edu](mailto:dphurst@uncg.edu) (D.P.H.); [dlynch@uncg.edu](mailto:dlynch@uncg.edu) (D.L.L.).

8 <sup>2</sup> Instituto de Química Medica (IQM-CSIC), C/Juan de la Cierva 3, 28006 Madrid, Spain;  
9 [paula.morales@iqm.csic.es](mailto:paula.morales@iqm.csic.es)

10 <sup>3</sup> Department of Physiology and Biophysics, The State University of New York at Buffalo, Buffalo, NY, 14260,  
11 USA; [nouroddi@buffalo.edu](mailto:nouroddi@buffalo.edu)

12 \* Correspondence: [phreggio@uncg.edu](mailto:phreggio@uncg.edu)

### 13 **Content**

14 **Figure S1:** Human sequence alignments of S1PR1 and GPR6 receptors.

15 **Figure S2:** Molecular electrostatic potential maps of conformations of docked ligands.

16 **Figure S3:** Atom numbering description of GPR6 modulators - Pyrazine analogs used for  
17 conformational analysis.

18 **Figure S4:** G-133/GPR6 R complex.

19 **Figure S5:** H-33/GPR6 R complex.

20 **Figure S6:** I-247/GPR6 R complex.

21 **Table S1:** Distance and angle measurements for interactions found in ligand/GPR6 R complexes.

22 **Table S2:** Compound A-415/GPR6 R complex interaction energy decomposition

23 **Table S3:** Compound B-582/GPR6 R complex interaction energy decomposition.

24 **Table S4:** Compound C-2/GPR6 R complex interaction energy decomposition.

25 **Table S5:** Compound D-33/GPR6 R complex interaction energy decomposition.

26 **Table S6:** Compound E-5/GPR6 R complex interaction energy decomposition.

27 **Table S7:** Compound G-133/GPR6 R complex interaction energy decomposition.

28 **Table S8:** Compound H-33/GPR6 R complex interaction energy decomposition.

29 **Table S9:** Compound I-247/GPR6 R complex interaction energy decomposition.

30

31



37 **Figure S2:** Molecular electrostatic potential maps of the global minimum conformations of docked ligands.  
38 The electrostatic potential scale (in kJ/mol) is provided as a color scale. This scale is from blue (most  
39 electropositive) to red (most electronegative). The numbers next to the alphabetic letter for each compound  
40 come from Envoy Therapeutics, Inc. and Takeda Pharmaceutical Company patents.

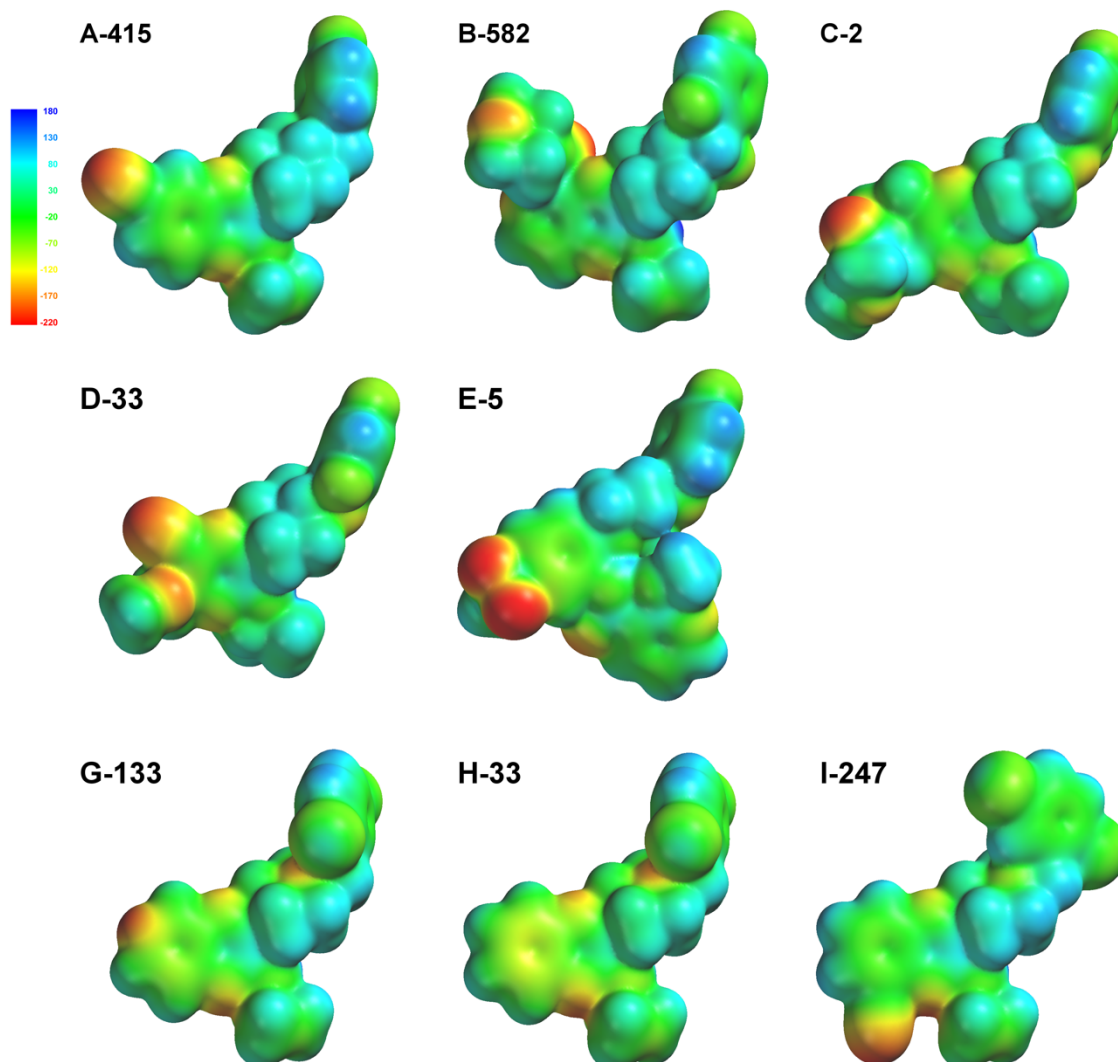

42 **Figure S3:** Atom numbering description of GPR6 modulators - Pyrazine analogs used for  
43 conformational analysis. Conformer searches were performed for all red rotatable bonds.

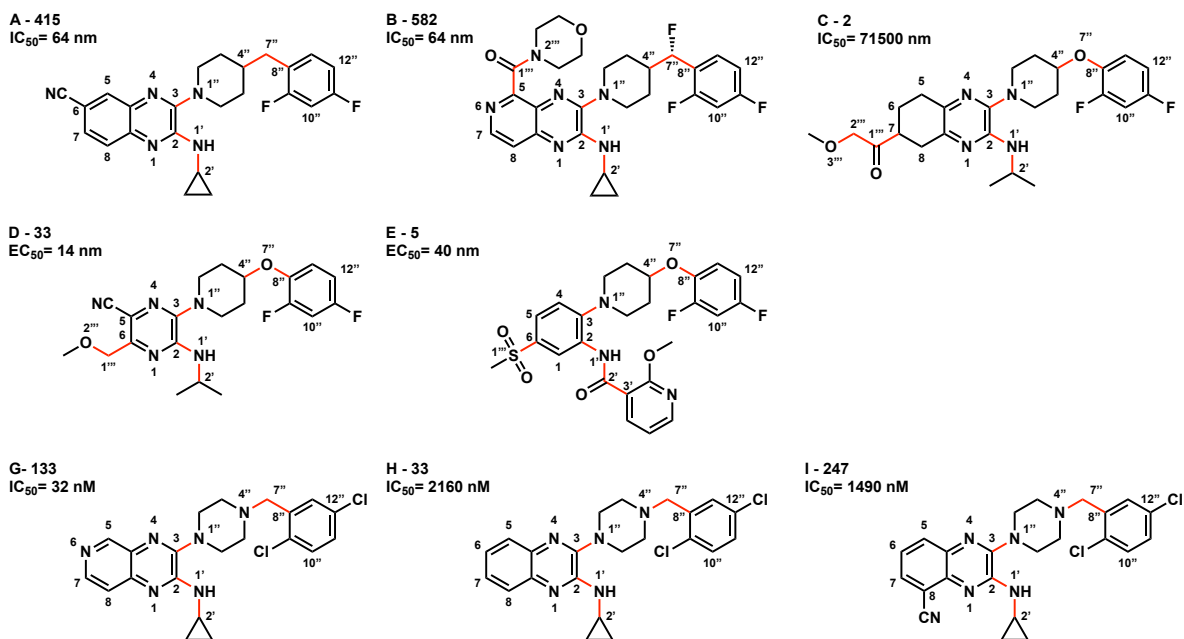

45 **Table S1:** Distance and angle measurements for interactions found in ligand/GPR6 R complexes.

| Interaction Type  | Residue/Atom | Measurements | Ligands      |       |      |      |      |       |      |       |
|-------------------|--------------|--------------|--------------|-------|------|------|------|-------|------|-------|
|                   |              |              | A-415        | B-582 | C-2  | D-33 | E-5  | G-133 | H-33 | I-247 |
| Aromatic Stacking | W1.35(75)    | Distance (Å) | 5.19         | -     | 6.43 | 5.74 | -    | -     | -    | 5.59  |
|                   |              | Angle (deg)  | 60           | -     | 52   | 56   | -    | -     | -    | 76    |
| Aromatic Stacking | H2.60(128)   | Distance (Å) | 6.88         | 5.78  | 5.41 | 5.71 | 5.40 | -     | -    | 5.55  |
|                   |              | Angle (deg)  | 77           | 47    | 87   | 85   | 76   | -     | -    | 57    |
| Aromatic Stacking | F2.61(129)   | Distance (Å) | -            | -     | -    | -    | 6.46 | -     | -    | -     |
|                   |              | Angle (deg)  | -            | -     | -    | -    | 78   | -     | -    | -     |
| Aromatic Stacking | F3.36(152)   | Distance (Å) | 5.77         | 5.77  | -    | -    | -    | 5.50  | 5.38 | -     |
|                   |              | Angle (deg)  | 78           | 65    | -    | -    | -    | 84    | 87   | -     |
| Hydrogen Bond     | R(220)       | NE-X         | Distance (Å) | 3.13  | 2.91 | -    | 3.14 | 2.86  | -    | -     |
|                   |              | NE-H- -X     | Angle (deg)  | 149   | 145  | -    | 148  | 175   | -    | -     |
|                   |              | NH1-X        | Distance (Å) | -     | -    | -    | -    | -     | 3.11 | -     |
|                   |              | NH1-H- -X    | Angle (deg)  | -     | -    | -    | -    | -     | 144  | -     |
|                   |              | NH2-X        | Distance (Å) | 3.00  | 2.78 | 2.91 | 3.04 | 2.70  | 3.00 | -     |
|                   |              | NH2-H- -X    | Angle (deg)  | 153   | 147  | 147  | 151  | 166   | 147  | -     |
| Aromatic Stacking | W6.48(292)   | Distance (Å) | 4.93         | -     | -    | 5.90 | 5.43 | 5.32  | 5.34 | -     |
|                   |              | Angle (deg)  | 44           | -     | -    | 35   | 79   | 58    | 61   | -     |
| Aromatic Stacking | F6.51(295)   | Distance (Å) | -            | 5.42  | 5.59 | 5.29 | 5.85 | 5.34  | 5.27 | 6.10  |
|                   |              | Angle (deg)  | -            | 78    | 54   | 72   | 72   | 86    | 85   | 76    |
| Aromatic Stacking | Y7.36(312)   | Distance (Å) | 5.96         | -     | -    | -    | -    | 5.21  | -    | -     |
|                   |              | Angle (deg)  | 60           | -     | -    | -    | -    | 50    | -    | -     |

46 X: represent ligand's heteroatom that forms the hydrogen bond interaction with R220.

47

**48** **Table S2:** Compound A-415/GPR6 R complex interaction energy decomposition.

| Compound A-415        |                             |                             |                            |
|-----------------------|-----------------------------|-----------------------------|----------------------------|
| Residue               | Electrostatic<br>(kcal/mol) | Van der Waals<br>(kcal/mol) | Total Energy<br>(kcal/mol) |
| L3.32(148)            | -0.06                       | -7.01                       | -7.07                      |
| R(220)                | -6.22                       | -0.06                       | -6.28                      |
| L7.39(315)            | 0.05                        | -4.75                       | -4.7                       |
| L2.57(125)            | 0.22                        | -3.87                       | -3.65                      |
| T7.43(319)            | -0.22                       | -3.05                       | -3.27                      |
| W6.48(292)            | -0.02                       | -2.39                       | -2.42                      |
| V3.33(149)            | -0.13                       | -2.18                       | -2.31                      |
| L(60)                 | -0.1                        | -2.09                       | -2.19                      |
| Q(132)                | 0.18                        | -2.35                       | -2.17                      |
| F6.51(295)            | -0.17                       | -1.84                       | -2.01                      |
| Y7.36(312)            | -0.48                       | -1.44                       | -1.92                      |
| W1.35(75)             | 0.16                        | -1.92                       | -1.77                      |
| A2.53(121)            | 0.13                        | -1.83                       | -1.7                       |
| F3.36(152)            | 0.09                        | -1.78                       | -1.69                      |
| A7.42(318)            | 0.00                        | -1.66                       | -1.66                      |
| L(56)                 | -0.04                       | -1.42                       | -1.46                      |
| V(135)                | -0.08                       | -1.11                       | -1.19                      |
| G2.54(122)            | -0.06                       | -0.81                       | -0.87                      |
| S7.46(322)            | 0.03                        | -0.81                       | -0.78                      |
| L1.39(79)             | 0.02                        | -0.75                       | -0.73                      |
| H2.60(128)            | -0.09                       | -0.5                        | -0.59                      |
| V3.29(145)            | -0.01                       | -0.51                       | -0.51                      |
| D2.50(118)            | -0.24                       | -0.19                       | -0.43                      |
| F2.61(129)            | -0.05                       | -0.35                       | -0.41                      |
| T3.28(144)            | -0.01                       | -0.28                       | -0.3                       |
| L7.40(316)            | -0.04                       | -0.23                       | -0.26                      |
| S(57)                 | 0.01                        | -0.26                       | -0.25                      |
| S3.35(151)            | 0.06                        | -0.3                        | -0.24                      |
| L5.43(230)            | -0.06                       | -0.16                       | -0.22                      |
| I1.46(86)             | 0.02                        | -0.21                       | -0.19                      |
| Interaction Energy    |                             |                             | -53.21                     |
| Conformational Energy |                             |                             | 1.6                        |
| Total Energy          |                             |                             | -51.71                     |

|             |  |  |        |
|-------------|--|--|--------|
| Glide Score |  |  | -10.10 |
|-------------|--|--|--------|

49

50

51 **Table S3:** Compound **B-582**/GPR6 R complex interaction energy decomposition.

| Compound <b>B-582</b> |                             |                             |                            |
|-----------------------|-----------------------------|-----------------------------|----------------------------|
| Residue               | Electrostatic<br>(kcal/mol) | Van der Waals<br>(kcal/mol) | Total Energy<br>(kcal/mol) |
| R(220)                | -8.85                       | -2.66                       | -11.51                     |
| L7.39(315)            | 0.06                        | -6.25                       | -6.19                      |
| L3.32(148)            | -0.08                       | -5.57                       | -5.64                      |
| W6.48(292)            | -0.02                       | -2.72                       | -2.75                      |
| V3.33(149)            | -0.12                       | -2.40                       | -2.52                      |
| C6.55(299)            | -0.60                       | -1.72                       | -2.32                      |
| V(219)                | 0.36                        | -2.67                       | -2.31                      |
| F3.36(152)            | -0.17                       | -2.14                       | -2.30                      |
| T7.43(319)            | -0.24                       | -1.97                       | -2.21                      |
| F6.51(295)            | 0.21                        | -2.40                       | -2.20                      |
| H2.60(128)            | -0.44                       | -1.38                       | -1.82                      |
| L2.57(125)            | 0.00                        | -1.58                       | -1.58                      |
| Y7.36(312)            | -0.21                       | -1.17                       | -1.38                      |
| V(135)                | 0.00                        | -1.26                       | -1.27                      |
| L(56)                 | 0.06                        | -1.18                       | -1.12                      |
| V3.29(145)            | 0.01                        | -1.12                       | -1.11                      |
| A7.42(318)            | 0.05                        | -1.09                       | -1.05                      |
| S(57)                 | -0.04                       | -0.93                       | -0.97                      |
| T7.35(311)            | -0.07                       | -0.68                       | -0.75                      |
| A2.53(121)            | 0.08                        | -0.65                       | -0.57                      |
| S(53)                 | 0.12                        | -0.65                       | -0.54                      |
| W1.35(75)             | 0.00                        | -0.42                       | -0.42                      |
| S(217)                | -0.03                       | -0.36                       | -0.39                      |
| T3.28(144)            | 0.03                        | -0.36                       | -0.33                      |
| V(218)                | 0.11                        | -0.39                       | -0.28                      |
| L5.43(230)            | -0.01                       | -0.19                       | -0.20                      |
| V5.40(227)            | -0.01                       | -0.10                       | -0.12                      |
| G2.54(122)            | -0.01                       | -0.10                       | -0.11                      |
| L(54)                 | 0.01                        | -0.11                       | -0.10                      |
| S7.46(322)            | 0.01                        | -0.09                       | -0.08                      |
| S3.35(151)            | 0.06                        | -0.12                       | -0.06                      |
| Interaction Energy    |                             |                             | -54.17                     |
| Conformational Energy |                             |                             | 2.5                        |
| Total Energy          |                             |                             | -51.67                     |



|             |  |  |       |
|-------------|--|--|-------|
| Glide Score |  |  | -8.72 |
|-------------|--|--|-------|

52

53

54 **Table S4:** Compound C-2 /GPR6 R complex interaction energy decomposition.

| Compound C-2          |                             |                             |                            |
|-----------------------|-----------------------------|-----------------------------|----------------------------|
| Residue               | Electrostatic<br>(kcal/mol) | Van der Waals<br>(kcal/mol) | Total Energy<br>(kcal/mol) |
| L3.32(148)            | -0.33                       | -5.96                       | -6.28                      |
| R(220)                | -5.98                       | -0.01                       | -5.99                      |
| F6.51(295)            | 0.21                        | -4.45                       | -4.24                      |
| L7.39(315)            | -0.02                       | -3.9                        | -3.92                      |
| L2.57(125)            | 0.02                        | -3.76                       | -3.73                      |
| W6.48(292)            | 0.2                         | -3.46                       | -3.26                      |
| F3.36(152)            | 0.27                        | -3.27                       | -3.00                      |
| H2.60(128)            | -0.57                       | -1.92                       | -2.49                      |
| T7.43(319)            | -0.18                       | -1.91                       | -2.1                       |
| V3.29(145)            | 0.07                        | -2.00                       | -1.93                      |
| V3.33(149)            | 0.10                        | -1.92                       | -1.82                      |
| A2.53(121)            | 0.03                        | -1.62                       | -1.59                      |
| T3.28(144)            | -0.11                       | -1.00                       | -1.11                      |
| V(135)                | -0.04                       | -1.02                       | -1.06                      |
| C6.55(299)            | 0.00                        | -1.04                       | -1.04                      |
| A6.52(296)            | 0.06                        | -1.05                       | -0.99                      |
| L5.43(230)            | -0.04                       | -0.82                       | -0.86                      |
| W1.35(75)             | 0.01                        | -0.8                        | -0.80                      |
| A7.42(318)            | -0.01                       | -0.67                       | -0.69                      |
| F5.47(234)            | 0.06                        | -0.72                       | -0.67                      |
| S3.35(151)            | 0.07                        | -0.5                        | -0.44                      |
| Y7.36(312)            | -0.49                       | -1.16                       | -0.64                      |
| S3.25(141)            | -0.01                       | -0.29                       | -0.3                       |
| S5.44(231)            | -0.01                       | -0.25                       | -0.25                      |
| G2.54(122)            | 0.02                        | -0.22                       | -0.2                       |
| Q(132)                | 0.03                        | -0.22                       | -0.2                       |
| S7.46(322)            | 0.02                        | -0.11                       | -0.09                      |
| L(60)                 | 0.02                        | -0.09                       | -0.08                      |
| Interaction Energy    |                             |                             | -49.77                     |
| Conformational Energy |                             |                             | 2.6                        |
| Total Energy          |                             |                             | -47.17                     |
| Glide score           |                             |                             | -7.69                      |

56 **Table S5:** Compound D-33 /GPR6 R complex interaction energy decomposition.

| Compound D-33         |                             |                             |                            |
|-----------------------|-----------------------------|-----------------------------|----------------------------|
| Residue               | Electrostatic<br>(kcal/mol) | Van der Waals<br>(kcal/mol) | Total Energy<br>(kcal/mol) |
| R(220)                | -6.54                       | -0.84                       | -7.38                      |
| L3.32(148)            | -0.23                       | -5.35                       | -5.59                      |
| L7.39(315)            | -0.1                        | -4.92                       | -5.01                      |
| W6.48(292)            | -0.11                       | -4.45                       | -4.56                      |
| F3.36(152)            | -0.2                        | -4.22                       | -4.41                      |
| L2.57(125)            | 0.01                        | -3.43                       | -3.42                      |
| V3.33(149)            | -0.09                       | -2.91                       | -3.00                      |
| F6.51(295)            | -0.25                       | -2.63                       | -2.88                      |
| T7.43(319)            | -0.35                       | -1.97                       | -2.32                      |
| Q(132)                | -0.06                       | -1.77                       | -1.84                      |
| W1.35(75)             | -0.14                       | -1.58                       | -1.72                      |
| H2.60(128)            | -0.23                       | -1.48                       | -1.71                      |
| V3.29(145)            | -0.01                       | -1.41                       | -1.42                      |
| Y7.36(312)            | 0.44                        | -1.67                       | -1.23                      |
| A2.53(121)            | 0.09                        | -1.31                       | -1.22                      |
| L(60)                 | -0.02                       | -0.96                       | -0.99                      |
| V(135)                | -0.05                       | -0.78                       | -0.83                      |
| S3.35(151)            | 0.13                        | -0.75                       | -0.62                      |
| A7.42(318)            | -0.04                       | -0.44                       | -0.47                      |
| L7.40(316)            | -0.08                       | -0.34                       | -0.42                      |
| T3.28(144)            | 0.05                        | -0.43                       | -0.38                      |
| L5.43(230)            | -0.07                       | -0.26                       | -0.33                      |
| P5.47(234)            | -0.03                       | -0.19                       | -0.21                      |
| G2.54(122)            | -0.01                       | -0.16                       | -0.17                      |
| S7.46(322)            | 0.03                        | -0.13                       | -0.1                       |
| A6.52(296)            | 0.05                        | -0.09                       | -0.03                      |
| S3.39(155)            | 0.06                        | -0.05                       | 0.01                       |
| Interaction Energy    |                             |                             | -52.26                     |
| Conformational Energy |                             |                             | 1.9                        |
| Total Energy          |                             |                             | -50.36                     |
| Glide Score           |                             |                             | -8.71                      |

58 **Table S6:** Compound E-5/GPR6 R complex interaction energy decomposition.

| Compound E-5          |                             |                             |                            |
|-----------------------|-----------------------------|-----------------------------|----------------------------|
| Residue               | Electrostatic<br>(kcal/mol) | Van der Waals<br>(kcal/mol) | Total Energy<br>(kcal/mol) |
| R(220)                | -11.14                      | -0.15                       | -11.3                      |
| L3.32(148)            | -0.59                       | -5.77                       | -6.36                      |
| L7.39(315)            | -0.12                       | -6.06                       | -6.18                      |
| L2.57(125)            | -0.15                       | -4.04                       | -4.19                      |
| V3.29(145)            | 0.33                        | -4.03                       | -3.71                      |
| H2.60(128)            | -0.08                       | -2.97                       | -3.04                      |
| F6.51(295)            | -0.22                       | -2.48                       | -2.7                       |
| F2.61(129)            | -0.18                       | -2.39                       | -2.57                      |
| W6.48(292)            | -0.06                       | -2.47                       | -2.53                      |
| V3.33(149)            | 0.16                        | -2.68                       | -2.52                      |
| Y7.36(312)            | 0.07                        | -2.55                       | -2.48                      |
| Q(132)                | -0.4                        | -1.47                       | -1.87                      |
| A7.42(318)            | -0.28                       | -1.52                       | -1.8                       |
| T7.43(319)            | -0.07                       | -1.61                       | -1.68                      |
| V(135)                | -0.04                       | -1.27                       | -1.31                      |
| F3.36(152)            | 0.11                        | -1.35                       | -1.24                      |
| W1.35(75)             | -0.01                       | -1.14                       | -1.15                      |
| A2.53(121)            | 0.16                        | -1.11                       | -0.95                      |
| T3.28(144)            | 0.05                        | -0.97                       | -0.91                      |
| V(219)                | -0.20                       | -0.5                        | -0.7                       |
| L1.39(79)             | 0.01                        | -0.46                       | -0.45                      |
| L(60)                 | 0.05                        | -0.49                       | -0.43                      |
| C6.55(299)            | 0.35                        | -0.62                       | -0.27                      |
| L7.40(316)            | -0.05                       | -0.21                       | -0.26                      |
| S3.35(151)            | 0.19                        | -0.41                       | -0.22                      |
| L5.43(230)            | -0.05                       | -0.14                       | -0.18                      |
| G3.30(146)            | 0.01                        | -0.15                       | -0.14                      |
| S7.46(322)            | 0.09                        | -0.23                       | -0.13                      |
| G2.56(124)            | 0.01                        | -0.14                       | -0.13                      |
| L(56)                 | 0.01                        | -0.09                       | -0.08                      |
| L(222)                | 0.00                        | -0.06                       | -0.06                      |
| P(221)                | 0.03                        | -0.09                       | -0.06                      |
| Interaction Energy    |                             |                             | -61.62                     |
| Conformational Energy |                             |                             | 2.4                        |

|              |  |  |        |
|--------------|--|--|--------|
| Total Energy |  |  | -59.22 |
| Glide Score  |  |  | -10.38 |

59

60

61 **Figure S4:** G-133/GPR6 R complex. The view from the lipid bilayer with the EC portions of TMH6-7  
62 removed for clarity.

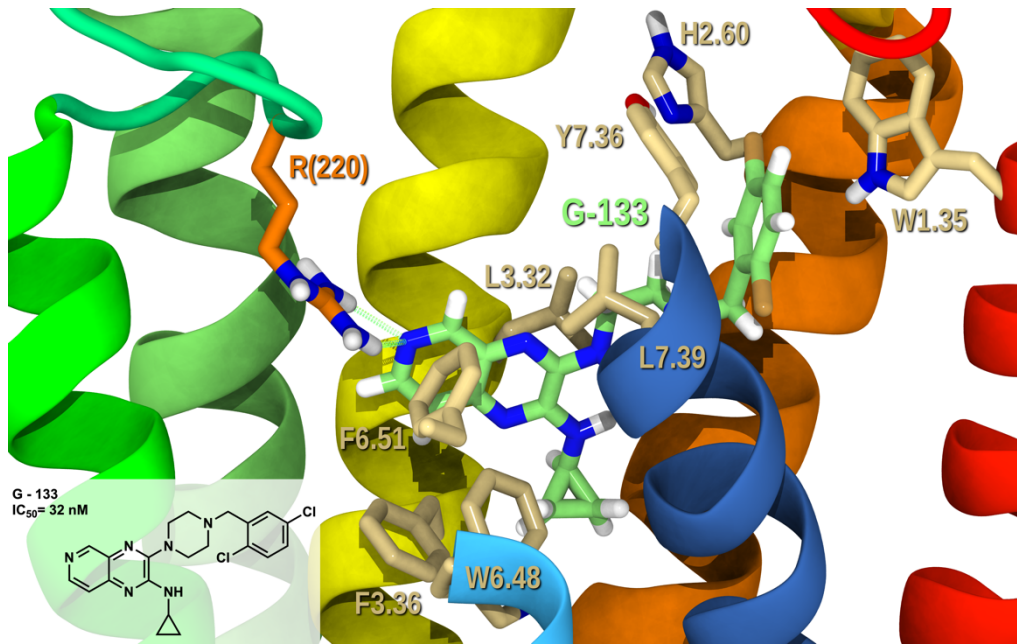

63  
64

65 **Figure S5: H-33/GPR6 R complex.** The view from the lipid bilayer with the EC portions of TMH6-7  
66 removed for clarity.

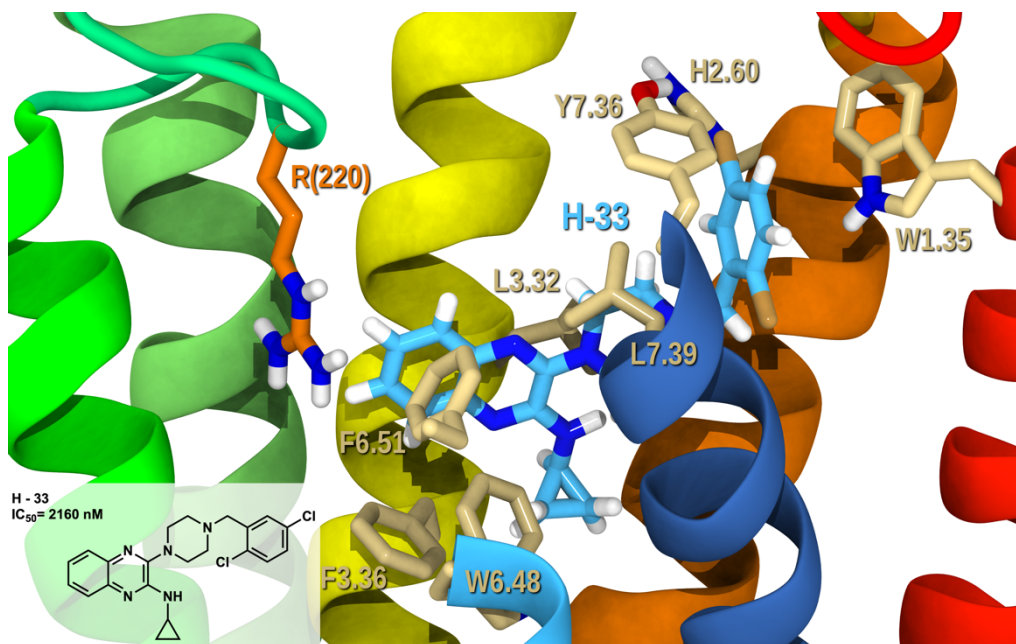

67  
68

69 **Figure S6: I-247/GPR6 R complex.** The view from the lipid bilayer with the EC portions of TMH6-7  
70 removed for clarity.

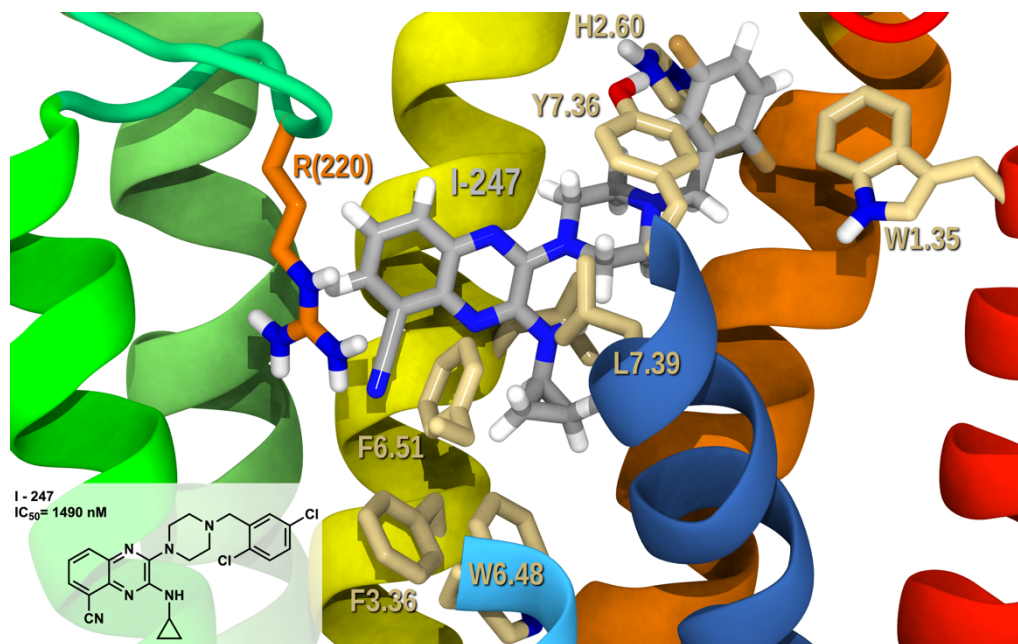

71  
72



73 **Table S7:** Compound **G-133**/GPR6 R complex interaction energy decomposition.

| Compound <b>G-133</b> |                             |                             |                            |
|-----------------------|-----------------------------|-----------------------------|----------------------------|
| Residue               | Electrostatic<br>(kcal/mol) | Van der Waals<br>(kcal/mol) | Total Energy<br>(kcal/mol) |
| L3.32(148)            | 0.05                        | -8.00                       | -7.95                      |
| L7.39(315)            | -0.46                       | -7.14                       | -7.60                      |
| F3.36(152)            | 0.15                        | -3.45                       | -3.30                      |
| L2.57(125)            | 0.19                        | -3.43                       | -3.24                      |
| R(220)                | -2.65                       | -0.31                       | -2.96                      |
| Y7.36(312)            | -0.01                       | -2.85                       | -2.86                      |
| W6.48(292)            | -0.07                       | -2.73                       | -2.80                      |
| V3.33(149)            | 0.03                        | -2.63                       | -2.60                      |
| W1.35(75)             | -0.20                       | -2.13                       | -2.33                      |
| A7.42(318)            | -0.03                       | -2.15                       | -2.18                      |
| T7.43(319)            | -0.77                       | -1.37                       | -2.14                      |
| L1.39(79)             | -0.01                       | -2.09                       | -2.10                      |
| F6.51(295)            | -0.07                       | -1.58                       | -1.64                      |
| L(60)                 | 0.02                        | -1.47                       | -1.45                      |
| L7.40(316)            | 0.08                        | -1.40                       | -1.32                      |
| S3.35(151)            | -0.20                       | -0.79                       | -0.99                      |
| A2.53(121)            | 0.11                        | -0.88                       | -0.78                      |
| D2.50(118)            | -0.30                       | -0.44                       | -0.74                      |
| V3.29(145)            | 0.06                        | -0.64                       | -0.57                      |
| V(135)                | -0.03                       | -0.52                       | -0.55                      |
| S7.46(322)            | -0.04                       | -0.40                       | -0.45                      |
| F2.61(129)            | 0.02                        | -0.37                       | -0.35                      |
| Q(132)                | 0.16                        | -0.40                       | -0.24                      |
| G2.54(122)            | -0.04                       | -0.20                       | -0.24                      |
| A2.49(117)            | -0.07                       | -0.15                       | -0.23                      |
| N7.45(321)            | 0.02                        | -0.18                       | -0.16                      |
| A3.37(153)            | 0.00                        | -0.09                       | -0.09                      |
| S3.39(155)            | 0.07                        | -0.13                       | -0.06                      |
| P(64)                 | 0.01                        | -0.06                       | -0.05                      |
| Interaction Energy    |                             |                             | -51.92                     |
| Conformational Energy |                             |                             | 1.4                        |
| Total Energy          |                             |                             | -50.52                     |
| Glide Score           |                             |                             | -9.40                      |

74

75

76 **Table S8:** Compound **H-33**/GPR6 R complex interaction energy decomposition.

| Compound <b>H-33</b>  |                             |                             |                            |
|-----------------------|-----------------------------|-----------------------------|----------------------------|
| Residue               | Electrostatic<br>(kcal/mol) | Van der Waals<br>(kcal/mol) | Total Energy<br>(kcal/mol) |
| L7.39(315)            | -0.43                       | -7.49                       | -7.92                      |
| L3.32(148)            | 0.03                        | -7.22                       | -7.19                      |
| F3.36(152)            | 0.08                        | -3.48                       | -3.40                      |
| W6.48(292)            | -0.12                       | -2.79                       | -2.91                      |
| L2.57(125)            | 0.12                        | -2.96                       | -2.84                      |
| W1.35(75)             | -0.24                       | -2.45                       | -2.69                      |
| V3.33(149)            | 0.03                        | -2.61                       | -2.58                      |
| Y7.36(312)            | 0.14                        | -2.67                       | -2.53                      |
| A7.42(318)            | -0.04                       | -2.05                       | -2.09                      |
| T7.43(319)            | -0.75                       | -1.32                       | -2.08                      |
| F6.51(295)            | -0.09                       | -1.37                       | -1.46                      |
| L7.40(316)            | 0.10                        | -1.52                       | -1.42                      |
| L1.39(79)             | 0.00                        | -1.33                       | -1.34                      |
| S3.35(151)            | -0.18                       | -0.80                       | -0.99                      |
| H2.60(128)            | -0.14                       | -0.85                       | -0.98                      |
| L(60)                 | -0.01                       | -0.96                       | -0.97                      |
| R(220)                | 0.65                        | -1.60                       | -0.95                      |
| A2.53(121)            | 0.07                        | -0.96                       | -0.89                      |
| D2.50(118)            | -0.20                       | -0.36                       | -0.56                      |
| V3.29(145)            | 0.05                        | -0.57                       | -0.52                      |
| V(135)                | -0.02                       | -0.32                       | -0.34                      |
| S7.46(322)            | -0.01                       | -0.26                       | -0.27                      |
| A2.49(117)            | -0.06                       | -0.14                       | -0.20                      |
| T3.28(144)            | 0.01                        | -0.19                       | -0.18                      |
| G2.54(122)            | -0.03                       | -0.14                       | -0.17                      |
| N7.45(321)            | 0.01                        | -0.15                       | -0.14                      |
| A3.37(153)            | 0.00                        | -0.09                       | -0.09                      |
| S3.39(155)            | 0.06                        | -0.13                       | -0.07                      |
| P(64)                 | 0.01                        | -0.06                       | -0.04                      |
| Interaction Energy    |                             |                             | -47.82                     |
| Conformational Energy |                             |                             | 2.2                        |
| Total Energy          |                             |                             | -45.52                     |
| Glide Score           |                             |                             | -9.90                      |

77

78

79 **Table S9:** Compound I-247/GPR6 R complex interaction energy decomposition.

| Compound I-247        |                             |                             |                            |
|-----------------------|-----------------------------|-----------------------------|----------------------------|
| Residue               | Electrostatic<br>(kcal/mol) | Van der Waals<br>(kcal/mol) | Total Energy<br>(kcal/mol) |
| L3.32(148)            | 0.16                        | -5.99                       | -5.83                      |
| L7.39(315)            | -0.03                       | -4.46                       | -4.49                      |
| R(220)                | -0.67                       | -3.64                       | -4.31                      |
| V3.29(145)            | 0.06                        | -3.89                       | -3.83                      |
| H2.60(128)            | -0.19                       | -3.21                       | -3.40                      |
| F6.51(295)            | -0.19                       | -2.89                       | -3.08                      |
| Y7.36(312)            | -0.73                       | -1.91                       | -2.65                      |
| V3.33(149)            | 0.02                        | -2.57                       | -2.55                      |
| L2.57(125)            | 0.42                        | -2.65                       | -2.24                      |
| Q(132)                | -0.43                       | -1.48                       | -1.90                      |
| F3.36(152)            | -0.22                       | -1.65                       | -1.87                      |
| V(135)                | 0.10                        | -1.94                       | -1.84                      |
| L(60)                 | -0.02                       | -1.81                       | -1.83                      |
| W1.35(75)             | 0.00                        | -1.67                       | -1.67                      |
| F2.61(129)            | -0.04                       | -1.38                       | -1.42                      |
| T3.28(144)            | 0.08                        | -0.80                       | -0.71                      |
| A7.42(318)            | 0.00                        | -0.71                       | -0.70                      |
| W6.48(292)            | 0.07                        | -0.57                       | -0.50                      |
| T7.43(319)            | -0.09                       | -0.38                       | -0.47                      |
| P(221)                | 0.13                        | -0.50                       | -0.38                      |
| L(56)                 | 0.04                        | -0.40                       | -0.37                      |
| L1.39(79)             | 0.00                        | -0.31                       | -0.31                      |
| S3.25(141)            | -0.05                       | -0.26                       | -0.31                      |
| S(57)                 | -0.01                       | -0.25                       | -0.26                      |
| V(219)                | -0.01                       | -0.20                       | -0.21                      |
| A2.53(121)            | -0.01                       | -0.18                       | -0.20                      |
| Interaction Energy    |                             |                             | -47.35                     |
| Conformational Energy |                             |                             | 1.7                        |
| Total Energy          |                             |                             | -45.65                     |
| Glide Score           |                             |                             | -8.16                      |

80

81
